1           **The *Drosophila* seminal Sex Peptide can associate with rival as well as own**  
2           **sperm and provide function for SP in polyandrous females**

3           Snigdha Misra, Mariana F. Wolfner<sup>\*</sup>  
4           Department of Molecular Biology and Genetics, Cornell University, Ithaca NY-14853, USA  
5  
6

7           \*Corresponding author  
8           Email: mfw5@cornell.edu  
9

10           Short title: Seminal sex-peptide binds to and benefits rival male's sperm  
11  
12  
13  
14  
15  
16  
17  
18  
19  
20  
21  
22  
23  
24

25 **Abstract**

26 In populations in which females tend to mate with more than one male, sperm  
27 competition and cryptic female choice can occur, triggering biases in sperm use and  
28 influencing males' paternity share outcome of the mating. This competition occurs in the  
29 context of molecules and cells of male and female working interdependently towards  
30 the common goal of optimal fertilization. For example, a male's seminal fluid molecules  
31 modify the female's physiology to increase reproductive success. However, since some  
32 of these modifications induce long-term changes in female physiology, this can indirectly  
33 benefit rival males. Indeed rival males can tailor their ejaculates accordingly, minimizing  
34 the energy cost of mating. Here we investigate the direct benefits that seminal fluid  
35 proteins from an ejaculate of one male can confer to sperm of a rival. We report that Sex  
36 Peptide (SP) that a female receives from one male can bind to sperm from a prior mate,  
37 that were already stored in the female. Moreover, the second male's SP can restore  
38 fertility and facilitate efficient sperm release or utilization of sperm received from the  
39 first male that had been stored in the female. Thus, SP from one male can directly benefit  
40 another and as such is a key molecular component in the process of inter-ejaculate  
41 interaction.

42

43

44 **Keywords:** Sperm competition, *Drosophila*, Seminal fluid protein, Fertility, Copulation  
45 complementation

46

47

48

## 49 **Introduction**

50 In many animal species, females mate with more than one male. This polyandry lays the  
51 foundation for sperm competition, in which ejaculates from rival males compete for  
52 fertilization opportunities [1,2]. These conflicts and associated cryptic female choice can  
53 drive the evolution of male traits including optimal sperm numbers, morphology, and  
54 seminal protein sequences [3–5].

55 Against the backdrop of these conflicts, male and female molecules and/or cells must  
56 also work together to ensure reproductive success. How efficiently sperm interact with  
57 the egg and instigate successful fertilization or embryo support (where relevant) is key  
58 to successful fertility. Accordingly, males have evolved molecular mechanisms to trigger  
59 physiological changes in females that increase the reproductive success of the mating  
60 pair. Seminal fluid proteins (SFPs) are crucial regulators of these changes. SFPs are  
61 produced within glandular tissues in the male reproductive tract and are transferred to  
62 females along with sperm during mating [6–11]. Within a mated female, SFPs mediate  
63 an array of post-mating responses such as, in insects, changes in egg production,  
64 elevated feeding rates, higher activity or reduced sleep levels, long-term memory,  
65 activation of the immune system and reduced sexual receptivity [12–18].

66 The ability of a male's SFPs to induce long-term changes in the mated female enhance  
67 that male's reproductive success. For example, the seminal Sex Peptide (SP) of male  
68 *Drosophila* binds to his sperm stored in the female, persisting there for approximately  
69 ten days [19]. This binding of SP to sperm is aided by the action of a network of other  
70 SFPs- "LTR-SFPs" [10,20,21]. The active region of SP is then gradually cleaved from  
71 sperm in storage, dosing the females to maintain high rates of egg laying, decreased  
72 receptivity to remating [19], increased food intake, and slower intestinal transit of the  
73 digested food to facilitate maximum absorption and production of concentrated faeces  
74 [12,22–24]. However, induction of these changes can also indirectly benefit his rival, as

75 the female's physiology will have already been primed for reproduction by her first  
76 mate's SFPs. Such indirect benefits to the second male have been suggested to explain  
77 the tailoring of the ejaculate by males that mate with previously mated females [11,25–  
78 27]. For example, the *Drosophila* seminal protein ovulin increases the number of  
79 synapses that the female's Tdc2 (octopaminergic) neurons make on the musculature of  
80 the oviduct above the amount seen in unmated females [28]. This is thought to sustain  
81 high octopaminergic (OA) signalling on the oviduct musculature of mated female,  
82 allowing increased ovulation to persist in mated female, even after ovulin is gone.  
83 Therefore, males mating with previously mated females need transfer less ovulin than  
84 males mated to virgin females, presumably because it may be less necessary, as they  
85 benefit from the ovulation stimulating effect of ovulin from the prior mating. In another  
86 example, prior receipt of Acp36DE can rescue sperm storage of a male that lacks this  
87 SFP [29].

88 The benefits to the second male described above are indirect consequences of the first  
89 male's SFPs effect on female's physiology. The second male is thus the lucky beneficiary  
90 of the first male's SFPs effect on the female. However, it is unknown whether a male  
91 could directly benefit from a rival's SFPs, for example, whether the latter could associate  
92 with and improve the success of another male's sperm. There was some suggestion that  
93 this might occur from the phenomenon of "copulation complementation"[30] in which a  
94 female *Drosophila* singly-mated to a male lacking SFPs did not produce progeny unless  
95 she was remated to a male who provided SFPs. This suggested that something from the  
96 second mating allowed the first male's sperm to be used. However, the molecular basis  
97 for this phenomenon was unknown.

98 Here, we report that SP, a *Drosophila* SFP received from a second male can bind to a  
99 prior male's SP-deficient sperm and restore his fertility, including sperm release from  
100 storage and changes in the female's behavior. Our results highlight the significance of

101 direct benefits that previously stored sperm from the first (or prior) male might receive  
102 from the second (or last) male's ejaculate during the course of successive matings. Our  
103 results also establish SP as a crucial long-term molecule that facilitates this inter-  
104 ejaculate interaction, and SP-sperm binding as the molecular mechanism that underlies  
105 copulation complementation in *Drosophila*. We discuss these findings in relation to  
106 sperm competition and the possibility of copulation complementation in nature.

## 107 **Results:**

### 108 **1. Sex peptide from one male can associate with sperm from another**

109 In matings with wild type (wt) males, SP binds to sperm that it enters the female with.  
110 However, we wondered if sperm stored by mates of *SP*-null males, that lack bound SP,  
111 could become decorated with SP from a second male even if he did not provide sperm. If  
112 so, this would mean that SP from a second (spermless) male can bind to sperm from a  
113 prior male, already present in female tract (Fig 1. Cartoon).

114 As expected, we detected no SP in sperm samples of females singly-mated to *SP*-null  
115 males (Fig 1A). We did, however, observe SP bound to these sperm if the female  
116 subsequently remated to a spermless male (who provided SP). This was observed for  
117 rematings at either 1d (Fig 1B) or 4d (Fig 1C) after the original SP-less mating. We  
118 confirmed these findings with western blotting. Sperm stored in seminal receptacles of  
119 females that had mated to *SP*-null males and subsequently remated to spermless males  
120 were dissected and probed for the presence of SP. Consistent with our immunostaining  
121 data, SP was detected in samples of *SP*-null male's sperm from females that had remated  
122 to spermless males at 1d or 4d after the start of first mating (ASFM; Fig 1D, lanes 7 and  
123 8).

124 We carried out the reciprocal cross to see if SP deposited by spermless males could bind  
125 to sperm that were subsequently introduced by *SP*-null males (Fig 2. Cartoon).  
126 Spermless males transfer SP to the female tract after mating [31], but we did not detect

127 any SP in females mated to spermless males by 1d after the start of mating (ASM; Fig 1D.  
128 lane 4). We saw no SP signal in sperm samples isolated from females that had mated to  
129 spermless males, and then subsequently to *SP*-null males at 1d ASFM (Fig 1D. lane 5).  
130 Our immunofluorescence data were consistent with our western blots: we saw no *SP*-  
131 sperm binding in females that mated first with a spermless male and a day later with *SP*-  
132 null male (Fig 2B).

133 We hypothesized that we did not see *SP* bound to sperm in the second (reciprocal)  
134 crossing scheme because by the time of the second mating *SP* from the spermless male  
135 was no longer present in the female at 1d ASFM, since it could not be retained without  
136 binding to sperm [19] and no sperm were being supplied by these first males. To  
137 circumvent this, we attempted to remate females that had previously mated to  
138 spermless males as soon as 3-6hrs ASFM. However, few females remated, likely due to  
139 the recent experience of copulation, or to the effects of pheromones from the previous  
140 mating [32,33]. In the few females that did remate, no *SP*-sperm binding was observed  
141 (Fig S1). We performed western blotting to determine how long *SP* persists in the  
142 reproductive tract of females in absence of sperm. Females mated to spermless males  
143 were flash frozen at 0'(min) immediately after mating, 35'(min), 1hr, and 3hr ASM and  
144 their bursa (B) and seminal receptacle (SR) were dissected and probed for the presence  
145 of *SP*. We detected *SP* in the bursa protein samples at 0'(min) after mating, 35'(min), and  
146 1hr ASM. (Fig 2D. lanes 5, 7, 9). However, *SP* was undetected in bursa or seminal  
147 receptacles of females at 3hr ASM (Fig 2D. lane 11, 12). Thus, we could not determine  
148 whether *SP* from mating with a spermless male could bind a second male's sperm,  
149 because *SP* received from the first mating was lost from the female reproductive tract  
150 before a second mating could occur. Xue and Noll [30] reported that a similar cross  
151 (females mated first to spermless males and then to *Prd* males) also gave no progeny  
152 (showed no copulation complementation) which they proposed to be due to inactivation

153 or early loss of SFPs in the absence of sperm. Our results provide the molecular  
154 explanation for their observation.

155 ***2. SP from a second male restores fertility, inhibits receptivity and regulates***  
156 ***optimal release of the first male's sperm from storage***

157 SP is needed for efficient sperm release and utilization from the female sperm storage  
158 organs [6]. We tested whether SP from a second male could restore the use of a first  
159 male's sperm. Females mated to spermless males have no progeny (Fig 3A). Females  
160 singly-mated to *SP*-null males have significantly reduced numbers of progeny (Fig 3A;  
161  $p^{***} < 0.001$ ) relative to females mated to control males (Fig 3A), likely because lack of  
162 SP prevents increase in egg production [17,34,35] and release of sperm from storage [6].  
163 However, females mated to *SP*-null males and then remated to spermless males at 1d  
164 (Fig 3B) and 4d (Fig 3C) ASFM had progeny levels similar to those of females that had  
165 mated to control (*SP*<sup>+</sup>) males and were subsequently remated to spermless males at the  
166 same time points. Thus, SP from the second male could rescue the first male's fertility  
167 defects that resulted from the first male's lack of SP.

168 Reducing the likelihood of mated females to remate is another crucial postmating  
169 response regulated by SP [34,36]. Females that do not receive SP generally fail to exhibit  
170 this reluctance, and remate readily. We tested whether SP from a second male could  
171 delay the receptivity of females that had previously mated to *SP*-null males. Females  
172 singly-mated to *SP*-null males or spermless males show a significantly higher tendency  
173 to remate at 1d ASM (Fig 3D;  $p^{***} < 0.001$ ) or 4d ASM (Fig 3E;  $p^{***} < 0.001$ ) relative to  
174 females mated to wt (CS) males (Fig 3D and 3E). In contrast, females mated to *SP*-null  
175 males and then remated to spermless males at 1d ASFM (Fig 3D;  $p = ns$ ) showed  
176 receptivity similar to mates of control males at 1d after the start of second mating  
177 (ASSM). The effect, however, did not persist as long as after a mating to a wt male. At 4d  
178 ASSM (Fig 3E;  $p^{***} < 0.001$ ) doubly-mated females exhibited higher receptivity relative  
179 to females mated to wt males but lower than those mated to spermless males. This could

180 be either because less SP from the second (spermless) mating is able to bind to stored  
181 sperm from the previous mating and thus SP levels have been more depleted by 4 days  
182 ASSM than after a control mating where the sperm-SP enter the female together.  
183 Alternatively, the active portion of SP received from a rival male, bound to first male's  
184 sperm might be released from the sperm at a higher rate. We performed western  
185 blotting to determine how long SP received from the second (spermless) male persists  
186 in the reproductive tract of females previously mated to *SP*-null males. Females singly-  
187 mated to CS males and those doubly-mated to *SP*-null males and spermless males at 1d  
188 ASFM were flash frozen at 2hr, 1d or 4d ASM/ASSM, respectively. SP signals were  
189 detected in females mated to CS males at 2hr, 1d or 4d ASM (Fig 3F. lanes 3, 4, 5). SP was  
190 detected in females mated to *SP*-null males and then remated to spermless males at 2hr  
191 and 1d ASSM (Fig 3F. lanes 6, 7) but not (or very weakly) at 4d ASSM (Fig 3F. lane 8).  
192 Taken together, our results show that SP from a second male can rescue the first male's  
193 receptivity defects that resulted from the first male's of lack of SP but that sufficient SP  
194 for such an effect is not retained for as long as in a control situation (e.g. a mating with a  
195 wt male).

196 SP is also needed for release of sperm from storage within the mated female [6]. Thus,  
197 females mated to *SP*-null males retain significantly more sperm in their seminal  
198 receptacle at 4d ASM. To test whether SP acquired from a spermless male in a second  
199 mating could also rescue this defect, we counted sperm in storage after a single mating  
200 with *SP*-null; *ProtB-eGFP* males and after mates of *SP*-null; *ProtB-eGFP* males had  
201 remated with spermless males. As expected, females mated to control (*SP*<sup>+</sup>; *ProtB-eGFP*)  
202 males had fewer sperm in their seminal receptacle (average of 127; Fig 3G and 3J)  
203 relative to mates of *SP*-null; *ProtB-eGFP* males, which had significantly higher sperm  
204 counts, indicating poor release of stored sperm (average of 263; Fig 3H and 3J;  
205  $p^{**} < 0.01$ ). However, mates of *SP*-null; *ProtB-eGFP* males that had remated with  
206 spermless males retained sperm in numbers similar to those observed in females mated



207 to control males (average of 143; Fig 3I and 3J;  $p=ns$ ). Thus, SP from a second male can  
208 rescue the sperm release defects of prior matings to males that lacked SP.

209

210 ***3. SP from a second male can bind to stored sperm from a previous male, while still***  
211 ***binding strongly to his own sperm***

212 In the experiments described above SP was provided by a spermless second male, but in  
213 nature females are much more likely to encounter a male who has his own sperm,  
214 capable of binding his SP. To test whether SP from a male with sperm can still bind to  
215 sperm from another male, we modified our experimental protocol such that females  
216 were mated to *SP*-null males as described earlier, but rather than spermless males, we  
217 now used *ProtB-dsRed* males [37] as the second male (Fig 4I. Cartoon). These second  
218 males have a full suite of SFPs, sperm and their sperm-heads are labeled with *ProtB-*  
219 *dsRed*. This allowed us to distinguish between sperm received from *SP*-null males and  
220 those received from *ProtB-dsRed* males. Females were frozen at 2hrs ASSM and sperm  
221 dissected from their seminal receptacles were probed for SP. We observed anti-SP  
222 staining along the entire sperm (head and tail) from *ProtB-dsRed* males (Fig 4B). Sperm  
223 received from the *SP*-null males (blue heads) were also stained with anti-SP along their  
224 length (head and tail; Fig 4B).

225 We also performed a parallel cross where we substituted *SP*-null males with multiply-  
226 mated control (CS) males with exhausted seminal reserves [38]. We carried out western  
227 blotting to determine the levels of SP in accessory glands (AG) of such multiply mated  
228 (CS) males and the amount of SP in their mates at 2hr ASM. We observed relatively weak  
229 SP signals in the AG of multiply-mated males (Fig S2. A, lane 4) and a very faint SP signal  
230 in females mated to these males (Fig S2. A, lane 5) compared to relatively strong SP  
231 signal in virgin (unmated) males and the females mated to these males (Fig S2. A, lane 2,  
232 3 respectively). Our immunofluorescence data showed no (or extremely weak) SP-  
233 sperm binding in sperm dissected from the seminal receptacle of females mated to SFP-

234 depleted males (Fig S2. C). Females mated to SFP-depleted CS males were then  
235 subsequently remated at 4d ASFM (long enough to have lost any SP signal from their  
236 first multiply-mated, mates) to *ProtB-dsRed* males. Sperm were dissected from the  
237 seminal receptacles of these females at 2hrs ASSM, and probed for SP (Fig 4II. Cartoon).  
238 We did not observe any detectable SP signal on sperm stored in females singly-mated to  
239 SFP-depleted CS males at 4d ASM (Fig 4C). However, we observed anti-SP staining along  
240 the entire sperm (head and tail) received by the doubly-mated female from the SFP-  
241 depleted CS male (blue heads; Fig 4D) and *ProtB-dsRed* males (red+ blue heads; Fig 4D).  
242 Thus, in a normal mating a male transfers sufficient SP to the female such that there is  
243 SP available to bind a rival male's sperm as well as his own. Also, SP from an unmated  
244 control male can bind to previously stored sperm of a male that had his SFP reserves  
245 depleted prior to mating with the female.

246

247 ***4. Sex peptide binding to sperm of a prior male does not require receipt of LTR- SFPs***  
248 ***from the second male***

249 SP binding to sperm requires the action of a network of other SFPs- "LTR-SFPs" [10,21].  
250 Most of the known LTR-SFPs bind to sperm transiently (CG1656, CG1652, CG9997 and  
251 antares) [20], while others do not bind to sperm (CG17575 or seminase) [39], rather  
252 facilitate the localization of other LTR-SFPs, and SP, to the seminal receptacle. However,  
253 no LTR-SFPs are detectable on sperm or in female RT at 1d ASM (Fig 5 & Fig S3). We  
254 wondered whether LTR-SFPs were required from the second male in order to bind his  
255 SP to the first male's sperm.

256 We carried out experiments similar to those previously described, in which females  
257 were first mated to *SP*-null males and then remated to spermless males at 1d ASFM. We  
258 froze females at 2hr ASSM and immunostained stored sperm dissected from their  
259 seminal receptacles, for the presence of LTR-SFPs that had been received from second  
260 (spermless) males.

261 Females mated to CS males and frozen at 2hr ASM served as positive controls for the  
262 sperm-binding of LTR-SFPs, CG1656 (Fig 5A), CG1652 (Fig 5E) and CG9997 (Fig 5I).  
263 Females singly mated to *SP*-null males, frozen at 2hr ASM, exhibited normal sperm-  
264 binding of LTR-SFPs, CG1656 (Fig 5B), CG1652 (Fig 5F) and CG9997 (Fig 5J), confirming  
265 that loss of SP affects neither the transfer nor the sperm-binding of other LTR-SFPs [20].  
266 By 1d ASM, stored sperm from females singly-mated to *SP*-null males showed no signal  
267 for the LTR-SFPs, CG1656 (Fig 5C), CG1652 (Fig 5G) and CG9997 (Fig 5K), as expected  
268 given the transient sperm-binding of these proteins [20]. Thus, by the time these  
269 females remated with spermless males (1d ASFM), all known LTR-SFPs received from  
270 the first (*SP*-null) male were undetectable on sperm.

271 Interestingly, although females that mated to *SP*-null males and then to spermless males  
272 showed SP signal on their sperm (as in Fig 1) at 2hrs ASSM, we detected no signal of  
273 LTR-SFPs, CG1656 (Fig 5D), CG1652 (Fig 5H) and CG9997 (Fig 5L) on those sperm at  
274 2hrs ASSM. This could be because LTR-SFPs from the second male could not enter the  
275 sperm storage organs in the absence of sperm or, alternatively, that their binding sites  
276 on sperm had been modified prior to the second mating (perhaps by the action of LTR-  
277 SFPs received from the first mating) to make them incapable of binding.

278 We verified these observations by western blots. Consistent with immunofluorescence  
279 data as in Fig 5A-L, LTR-SFP signals for CG1656, CG9997, CG1656 and Antares were  
280 detected in sperm dissected from females mated to CS and *SP*-null males at 2hr ASM  
281 (Fig 5M. lanes 3, 4). No LTR-SFP signals were detected in sperm dissected from females  
282 mated to *SP*-null males at 1d ASM (Fig 5M. lane 5) or in sperm dissected from females  
283 mated to *SP*-null males, remated to spermless males at 1d ASFM, and frozen 2hrs ASSM  
284 (Fig. 5M. lane 7). However, as expected, SP signals were detected in sperm dissected  
285 from females that mated to *SP*-null males, remated to spermless males at 1d ASFM and  
286 frozen 2hrs ASSM (Fig 5M. blot probed for SP, lane 7).

287 Two LTR-SFPs, CG17575 and *seminase*, do not bind to sperm, yet are crucial for SFP-  
288 sperm binding. In the absence of CG17575 or *seminase*, SP fails to bind to sperm [10,39].  
289 To determine if these proteins were required for a second male's SP binding to a first  
290 male's sperm, we first crossed females to *SP*-null males and then to *CG17575*-null or  
291 *seminase*-null males at 1d ASFM (Fig 6. Cartoon). In this situation, CG17575 and  
292 *seminase* had entered the female with the first male's sperm, but by the time of the  
293 second mating, were undetectable in the female (Fig S3). We examined whether in this  
294 situation SP transferred by *CG17575*-null (or *seminase*-null) males would still bind to the  
295 *SP*-null sperm stored in the female. We made use of *ProtB-eGFP* labelled *SP*-null males to  
296 differentiate between sperm received from first (cyan (DAPI+ eGFP) sperm heads) and  
297 second (blue (DAPI) sperm heads) males. Immunostaining and western blots for  
298 detection of SP on sperm dissected from females mated to *SP-null; ProtB-eGFP* males and  
299 then remated to *seminase*-null (Fig 6. A and C, lane 4) or *CG17575*-null (Fig 6. B and C,  
300 lane 5) males showed that SP received from the second male bound to sperm (head and  
301 tail) received from *SP-null; ProtB-eGFP* males. Sperm dissected from females singly-  
302 mated to *SP-null; ProtB-eGFP* males gave no SP signal, as expected (Fig 6. D, lane 3 and E)  
303 and sperm dissected from females singly-mated to *seminase*-null (Fig 6. D, lane 4 and F)  
304 or *CG17575*-null (Fig 6. D, lane 5 and G) males also showed no SP-sperm binding, as  
305 expected, due to lack of the LTR-SFP.

306 Thus sperm no longer detectably bind new LTR-SFPs after they have bound LTR-SFPs  
307 from their own (*SP*-null) male. That LTR-SFPs are needed for SP-sperm binding, and that  
308 SP from spermless male binds the first male's sperm, further suggests that the first  
309 male's sperm (or the female RT) had already been primed with its own LTR-SFPs during  
310 storage in the female tract.

311

312

313 **Discussion**

314 Ejaculate molecules, particularly the seminal fluid proteins (SFPs) that are received by  
315 females during mating, play crucial roles in successful fertilization. In *Drosophila* they  
316 induce striking changes in the physiology and behavior of females, instigating a wide  
317 array of post mating responses [6,14,28,29,39–41]. Some of these responses persist  
318 long-term, due to binding of a male's SP to his sperm and gradual release of the SP's  
319 active C-terminal region [19]. This important process is mediated by a cascade of "LTR-  
320 SFPs" that are needed to bind SP to sperm [10,20,21,39]. While all of the above can be  
321 seen as facilitating reproductive success of the mating pair (particularly from the male's  
322 perspective), SFPs also play roles in conflicts between males in species where females  
323 are polyandrous. Den Boer et al [42] investigated sperm survival in monoandrous and  
324 polyandrous ants and bees. They observed that while seminal fluid enhanced the  
325 survival of "self" sperm, it preferentially killed the sperm of rival males. In other words,  
326 while SFPs worked in a cooperative interdependent way with "self" sperm, they harmed  
327 rival sperm when in a situation of conflict (and cryptic female choice). Previous studies  
328 have shown that males respond to threat of rivals by altering the allocation of both  
329 sperm as well non-sperm components of their ejaculate (e.g for *Drosophila*: [11,25,26]).

330 Studies of SFP functions have tended to investigate how a male's SFPs can  
331 promote the interests of his own (self) sperm. However, some data suggest that one  
332 male's SFPs (ovulin, ACP36DE) can indirectly benefit another male's ejaculate within the  
333 reproductive tract of a polyandrous female [27–29,43,44]. Here, we tested for direct  
334 effects of one male's SFPs on another male's sperm and/or fertility. Specifically, we show  
335 that SP from a second male can bind to and act with sperm received from a previous  
336 mating. Sperm stored in females mated to *SP*-null males show no *SP*-sperm binding (as  
337 expected), but if these mated females subsequently remate to a spermless male, his *SP*  
338 can bind to stored sperm from the prior male. This binding of *SP* to the *SP*-null sperm

339 restores his fertility and proper sperm release dynamics. Even if a second male transfers  
340 sperm, he transfers sufficient SP to bind to his own and rival sperm. Finally, our data  
341 suggest that the LTR-SFPs (that usually assist in binding of SP to sperm) are not  
342 required from the second male for the association of his SP with sperm received from  
343 the first male (who had already provided LTR-SFPs). The first male's sperm appear to be  
344 sufficiently "primed" by prior receipt of their own LTR-SFPs to be able to bind SP from a  
345 second male.

346 ***SP from a second male can associate with a prior male's sperm that were stored***  
347 ***within the female***

348 Xue and Noll [30] reported that sperm transferred to females by *Prd* mutant males (that  
349 lack the entire suite of SFPs) were capable of fertilizing a few eggs to yield progeny, but  
350 only after the females were subsequently remated to spermless males. They coined the  
351 term "copulation complementation" to describe this phenomenon, and proposed that  
352 SFPs from the second male might interact with the first male's sperm to yield this result.  
353 However, they were unable to test or verify this hypothesis at the molecular level.

354 SP is the only SFP thus far known to persist within the *Drosophila* female (for 10-14 days  
355 post-mating), eliciting long-term post mating responses through gradual release of its C-  
356 terminal portion [19]. The long-term persistence of SP on sperm made it an excellent  
357 candidate to examine for interaction with rival sperm. Here, we report that SP  
358 subsequently received from a spermless male binds to a first male's sperm (*SP*-null).  
359 This association is apparent even if the second mating occurs at 1d or as long as 4d  
360 ASFM, indicating that binding of SP to the first male's sperm occurs irrespective of how  
361 long sperm have been in the storage organs. It remains unclear how SP received from  
362 spermless (second) male enters the sperm storage organs, where sperm from the first  
363 mating had been stored. However, Manier et al [37] reported that 60-90 min after the  
364 start of a second mating, 26% of the resident sperm (received from the previous mating)

365 are moved from storage back into the bursa where they mix with the second male's  
366 ejaculate before moving back into the storage. Therefore, it is possible that SP received  
367 from the spermless male binds to the first male's sperm that relocated to the bursa, and  
368 the newly SP-bound sperm are then transferred back into storage in the seminal  
369 receptacle.

370 ***The binding of SP received from one male to sperm of another can restore defects***  
371 ***that resulted from lack of SP from the first male***

372 In the absence of sperm, or if SP is not bound to sperm, females do not maintain post-  
373 mating responses and fail to efficiently release sperm from storage resulting in fewer  
374 sperm available for fertilization and fewer progeny [6,10,17,34]. We observed that these  
375 defects were restored when SP was received by females in a remating with spermless  
376 males. Thus, the second male's SP bound to the first male's sperm is functional. The  
377 rescue of the phenotype, however, was not as long lasting as in a normal single mating  
378 with SP transfer, wearing off by 4d postmating rather than the normal ~10d. This could  
379 be because only fewer sperm relocated from storage to the bursa [37], so they may not  
380 carry sufficient SP back into storage to associate with *SP*-null sperm. Consistent with  
381 this, the levels of SP that we see stained in these situations are lower than those in a wild  
382 type mating.

383 ***An unmated male transfers sufficient SP to bind to his own as well rival sperm***

384 We did not know whether the amount of SP that is transferred during mating is more  
385 than the available binding sites on sperm. Here, we observed that an unmated control  
386 male does transfer enough SP to bind his own as well as pre-stored sperm (*SP*-null) in a  
387 previously mated female. Consistent with our findings, several reports suggest that in  
388 response to potential threats of sperm competition and conflicts, males allocate the  
389 levels of SFPs and transfer more SP, yet less ovulin, to previously mated females [11,26].  
390 Rubinstein et al [28] demonstrated that ovulin induces ovulation acting through

391 octopamine (OA) neuronal signalling and increases the number of synapses that the  
392 female's Tdc2 neurons make on the musculature of the oviduct. This latter effect  
393 persisting could benefit rivals too, so males may thus be able to mitigate the levels of  
394 ovulin in their ejaculate. But the question remains that if SP from one male's ejaculate  
395 can bind to and assist another's sperm, why do males not lower the amount of SP  
396 transferred while mating? A potential explanation is that a male would still benefit by  
397 transferring enough SP to ensure that his own sperm remains saturated with SP, even at  
398 a cost of part of his SP binding to another male's sperm.

399 SP binds to sperm through its N-terminal region, and this region remains bound to  
400 sperm long-term [19]. The bound N-terminal region of SP on sperm stored in a mated  
401 female should not allow any further binding of SP coming from rival male's ejaculate.  
402 Therefore under what circumstances might SP-mediated copulation complementation  
403 occur in nature? In polygynous males, SFPs are depleted faster than sperm [38]. This  
404 could result in a situation in which a female who mated with a male with low levels of  
405 SFPs might not receive enough SP to saturate his sperm. In these circumstances, SP  
406 received from another male would help compensate for the lower amount of SP from the  
407 depleted first male's ejaculate. SFP depletion would, of course, not only affect the levels  
408 of SP, but also all the other crucial LTR-SFPs. However, we observed that while other  
409 LTR-SFPs enable SP to bind sperm, it is the quantity of bound SP that correlates with the  
410 duration of post-mating responses. In line with this hypothesis, we subjected a control  
411 male to recurrent matings (providing six virgins) over the span of two days, with an  
412 intent to exhaust their SFPs. We observed that sperm stored by subsequent (7<sup>th</sup>) females  
413 mated to these multiply-mated males had undetectable SP signals. However, when these  
414 females were remated to unmated control males, strong SP signals were detected on  
415 both the SFP-depleted sperm received from the previous mating and the newly received  
416 rival sperm. Therefore, our results support the idea that in nature males who have



417 multiply-mated might get some “help” from the SFPs of subsequent, less depleted, males.  
418 Interestingly, this inter-ejaculate interaction might confer an added advantage to the  
419 second male. More of the second male’s SP will be retained in the female reproductive  
420 tract, for even longer, if it binds to previously-stored sperm in addition to his own  
421 sperm. This could allow the post-mating responses in polyandrous females to be  
422 maintained for longer than in singly-mated females.

423 ***Association of a second male’s SP to sperm received from a prior male does not***  
424 ***require the receipt of LTR-SFPs from the second male***

425 Binding of SP to sperm is facilitated by a network of LTR-SFPs [10]. Two LTR-SFPs,  
426 CG17575 and seminase, do not themselves bind to sperm, whereas other LTR-SFPs bind  
427 sperm transiently (CG1652, CG1656, CG9997, antares). CG17575 and seminase localize  
428 the other LTR-SFPs, and SP, to sperm storage organs [10,20,39,41,45]. We found that SP  
429 from a second male (spermless or control) can associate with sperm from the first male  
430 (*SP*-null) even if it enters the female in absence of its own LTR-SFPs. This suggested that  
431 *SP*-null sperm (or the mated female RT) had already received any modifications from its  
432 own LTR-SFPs that were required for SP binding. This further suggests that once  
433 “primed”, a sperm can bind SP from a rival’s ejaculate without the need for additional  
434 LTR-SFPs, and can restore its own post-mating dynamics.

435 Thus, we find that a critical SFP from one male can associate and offer direct benefits to  
436 sperm from another male, restoring the SP function to the previously stored sperm. Our  
437 work shows that SP is a crucial candidate for copulation complementation in *Drosophila*,  
438 and that sperm in storage (or the female RT) are “primed” for SP binding by the first  
439 male’s LTR-SFPs. Thus, despite potential competition between males, there could be  
440 subtle cooperation between males as well. In addition, the allocation of resources by,  
441 and effects on, rival males that mate to polyandrous females, should be viewed in light of  
442 not only sexual conflicts, but also both direct and indirect effects of SFPs.

## 443 **Materials and Methods**

### 444 **1. Fly strains**

445 Spermless males, [*sons of tudor*, (*sot*) that lack sperm but produce and transfer a  
446 complete suite of SFPs] were the progeny of *bw sp tud<sup>1</sup>* females [46] mated to control,  
447 *Canton S* (CS) males. *Sex peptide* null mutant males ( $\Delta 325/\Delta 130$ ; which have sperm and  
448 the entire suite of SFPs except for SP) [34] were generated by crossing the SP knockout  
449 line ( $\Delta 325/TM3, Sb ry$ ) to a line carrying a deficiency for the *SP* gene ( $\Delta 130/TM3, Sb ry$ ).  
450 Control males were the TM3 siblings of *SP*-null mutants. Matings were conducted with  
451 wild type *D. melanogaster* females (CS). To determine sperm numbers, we generated a  
452 line carrying the *SP*-null mutation and Protamine B-eGFP tagged sperm (*ProtB-eGFP/Y*;  
453  $\Delta 325/\Delta 130$ ) by series of crosses between the *SP* knockout line ( $\Delta 325/TM3, Sb ry$ ) and  
454 *ProtB-eGFP (X); TM3/TM6* [37]. The *TM3* siblings of these males, (*SP<sup>+</sup>; ProtB-eGFP*)  
455 served as controls. Sperm-heads of these control males were tagged with ProtB-eGFP,  
456 but the males had normal levels of SP (Fig S4). All flies were reared under a 12:12h light-  
457 dark cycle at 22±1°C on standard yeast-glucose medium. Mating experiments were  
458 carried out by single-pair mating 3-5 day old virgin CS females to 3-5 day old unmated  
459 males of genotypes indicated in the text and remating the same female 1 day or 4 days  
460 after the start of first mating (ASFM) to age matched unmated males of the genotypes  
461 indicated in the text.

### 462 **2. Crossing scheme to study first male's sperm and rival's SP binding**

463 Xue and Noll [30] reported copulation complementation in females mated to *Prd* males  
464 (which produce sperm but lack SFPs) remated to spermless males (*sot*, which produce  
465 SFPs). We followed a similar scheme but to focus on SP specifically, we used *SP*-null  
466 males as the first male. As described in Results, we then remated these females to  
467 spermless males, which make SFPs but not sperm. We attempted to do the reciprocal

468 experiment, where females were mated to spermless males and then remated to *SP*-null  
469 males, but consistent with what was reported by Xue and Noll [30], we could not detect  
470 copulation complementation in this direction for technical reasons: *SP* from the  
471 spermless male did not persist long enough in the mated female to interact with the  
472 second male's sperm (see Results). We carried out rematings at three time points, 3-6  
473 hrs, 1d, and 4d AFSM. We assessed results at 2hr after the start of the second mating  
474 (ASSM).

### 475 **3. Fertility**

476 The reproductive performances of singly-mated or doubly-mated females were assayed  
477 by analyzing fertility (numbers of progeny eclosed over ten days) [31]. Briefly, the  
478 fertility assays were carried out with (A). "Single matings": Females were singly mated  
479 to (i) spermless males, (ii) *SP*-null males, or their (iii) *TM3* siblings (genetically-matched  
480 control males) in three individual sub-batches, and (B). "Rematings": Females were  
481 mated to *SP*-null males or their *TM3* siblings (*SP*<sup>+</sup>) and were then subsequently remated  
482 to spermless males at 1d and 4d ASFM. Matings that lasted 15 mins or more were  
483 considered successful. At the end of a mating, males were removed from the vials and  
484 females were allowed to lay eggs for 10 days after the start of mating (ASM) in the first  
485 batch and after the start of second mating (ASSM) in the second batch. Females were  
486 transferred to fresh food vials every three days. Flies emerging from each vial were  
487 counted. Fertility is represented as total progeny number produced by each female over  
488 a period of 10 days. The differences in fertility were analyzed through One way Analysis  
489 of Variance (ANOVA) followed by Tukey's multiple comparison tests for single-matings  
490 and Mann Whitney U-tests for rematings. All assays were repeated more than three  
491 times, with each group consisting of a minimum sample size of 20.

492

#### 493 **4. Receptivity**

494 To determine the propensity of females to remate, receptivity assays [17] were set for  
495 females singly mated to *SP*-null, spermless or CS males and females mated to *SP*-null  
496 males and then subsequently remated to spermless males at 1d ASFM. For the assay,  
497 females from singly-mated and doubly-mated groups were then provided with (CS)  
498 males at 1d and 4d ASM or ASSM, respectively. We determined the number of females  
499 that mated within 1hr from when the CS male was introduced within the vial. The data  
500 were analyzed by Fisher exact tests and Chi-squared group analyses.

#### 501 **5. Sperm utilization/ release from sperm storage organs in females**

502 To study the effect of first male's sperm and rival male's SP binding on sperm utilization  
503 and release, we generated *SP*-null males whose sperm-heads are labelled with ProtB-  
504 eGFP [37]. Females were mated to *SP*-null; *ProtB-eGFP* or *SP*<sup>+</sup>; *ProtB-eGFP* (control)  
505 males. Some of the mated females were frozen at 4d ASM for sperm counts. The  
506 remaining mates of *SP*-null; *ProtB-eGFP* males were remated to spermless males at 1d  
507 ASFM. These flies were flash-frozen at 4d ASSM. Subsequently, seminal receptacles of  
508 females singly-mated to *SP*-null; *ProtB-eGFP* and *SP*<sup>+</sup>; *ProtB-eGFP*, or doubly-mated to *SP*-  
509 null; *ProtB-eGFP* and spermless males, were dissected and eGFP sperm were counted (at  
510 a total magnification of 200X, with FITC filter on an Echo-Revolve microscope). Mature  
511 sperm in the seminal receptacles of mated females were counted twice to ensure  
512 reproducibility. The percent accuracy was 90-94%. Every group contained a minimum  
513 sample size of 15-20. Differences in the sperm counts between groups were analyzed  
514 statistically through One way ANOVA followed by Tukey's multiple comparison tests.

#### 515 **6. Brood matings**

516 Control (CS) males were subjected to brood matings [47,48] to deplete SFPs, as their  
517 levels are known to become exhausted at a higher rate than sperm numbers [38].

518 Briefly, three day old control males were mated to CS females in two broods (each  
519 consisting of three virgin females) over two days. The first mating of both broods was  
520 observed. On the third day, previously mated females were removed and the male was  
521 provided with an additional virgin female (7<sup>th</sup> mate), matings were observed and  
522 depleted CS males were removed. Half of the 7<sup>th</sup> mated females were frozen at 4d ASM,  
523 while the others were subsequently remated to control (*ProtB-dsRed*) males at 4d ASFM,  
524 and then frozen at 2hr ASSM. Sperm stored in the seminal receptacle of the frozen flies  
525 were dissected and immunostained for SP.

## 526 **7. Immunofluorescence**

527 Immunofluorescence was performed to detect SP-sperm binding [10,19,20]. Sperm  
528 dissected from seminal receptacles of experimental or control females were attached to  
529 poly-L-Lysine (Sigma) coated slides. Sample processing was carried out according to the  
530 protocol of Ravi Ram and Wolfner [10] with minor modifications. Samples were blocked  
531 with 5% bovine serum albumin, BSA in 0.1% PBX for 30min. Subsequently, samples  
532 were incubated overnight in rabbit anti-SP(1:200), CG1656(1:100), CG1652(1:50),  
533 CG9997(1:50) [20], in 0.1%BSA at 4°C overnight. Samples were then washed in PBS and  
534 incubated at room temperature for 2h in mouse anti-rabbit IgG coupled to alexa fluor  
535 488 (green) or 594 (red; Invitrogen) at a concentration of 1:300 in 1xPBS at room  
536 temperature in the dark. Samples were then washed in PBS, incubated in 0.01% DAPI  
537 for 3 min at room temperature in the dark, rewashed and mounted using antifade (0.2%  
538 N-propyl gallate in 75% glycerol; Sigma). The fluorescence was visualized under an  
539 Echo-Revolve fluorescence microscope at a magnification of 200X. A minimum of three  
540 independent immunostaining batches, with a minimum sample size of 10, were  
541 analyzed for each group.

542

543 **8. Sample preparation and Western blotting**

544 To further examine transfer, persistence or binding of SP to sperm stored in singly-  
545 mated or doubly-mated females, the lower reproductive tract (RT) or sperm stored (SS)  
546 in seminal receptacles of mated female were dissected. The dissected tissues (lower RT,  
547 n=5-10 or sperm, n =20-30) were suspended in 5µl of homogenization buffer (5% 1M  
548 Tris; pH 6.8, 2% 0.5M EDTA) and processed further according to the protocol of Ravi  
549 Ram and Wolfner [10]. Proteins from stored sperm or lower female reproductive tract  
550 were then resolved on 12% polyacrylamide SDS gel and processed further for western  
551 blotting. Affinity purified rabbit antibodies against SP(1:2000), CG1656(1:1000),  
552 CG1652(1:500), antares(1:500), CG9997(1:1000), CG17575(1:1000), seminase(1:1000)  
553 [10,20,39] and mouse antibody against actin (as a loading control; Millipore Corp., cat  
554 no. #MAB1501MI at 1:3000) were used as primary antibodies. HRP conjugated  
555 secondary anti-rabbit and anti-mouse antibodies (Jackson Research) were used for  
556 detection of SFPs at a concentration of 1:2000.

557 **Acknowledgements**

558 We thank Dr. Ravi Ram Kristipati, S. Allen, N. Brown , S. Delbare and D. Chen for helpful  
559 suggestions and comments on the manuscript, and N. Buehner for technical advice. We  
560 are grateful to the NIH for grant R01-HD038921 to M.F.W, which supported this work.

561 **Author contributions**

562 S.M. and M.F.W. designed the experiments; S.M. carried out the experiments; S.M. and  
563 M.F.W analyzed the results. S.M. and M.F.W. wrote and revised the manuscript.

564 **Conflict of interest statement**

565 The authors declare no conflict of interests.

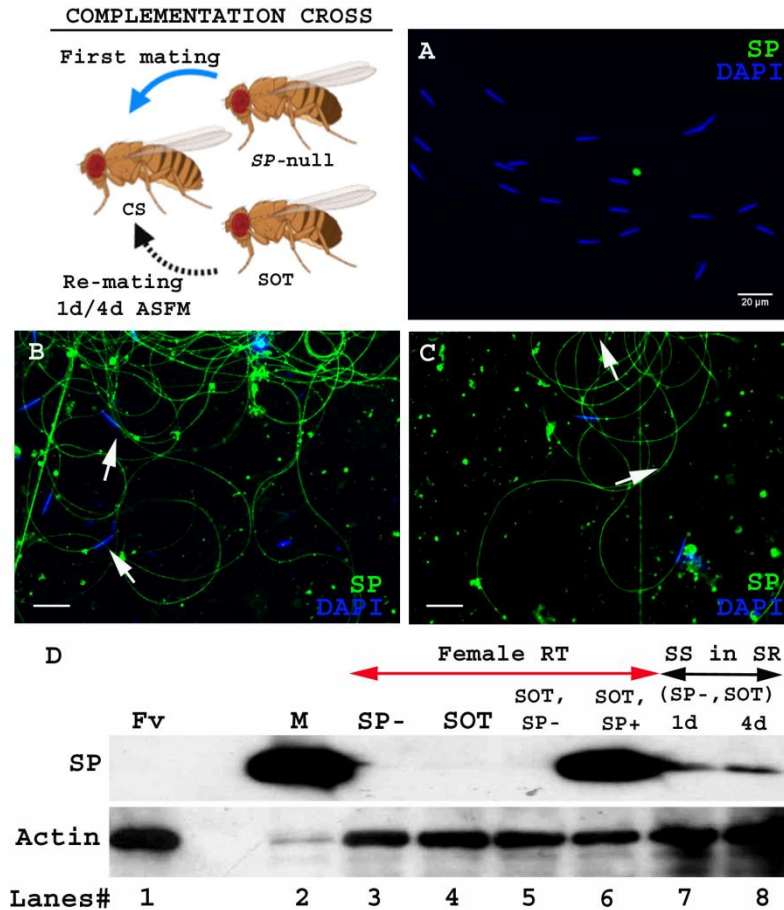

566

567 **Figure 1. SP from a second male can bind to SP deficient sperm of previous male**  
 568 **stored within a mated female.**

569 **Cartoon:** Pictorial representation of the crossing scheme (fly images from Biorender).  
 570 Wild type (CS) females were first mated to an *SP*-null male and then, at the indicated  
 571 time, to a spermless (*sot*) male. Sperm heads were stained with DAPI (blue) and SP  
 572 visualized with Alexa fluor 488, staining the sperm tail (green) and sperm head (cyan;  
 573 overlapping blue/green). **(A)** Sperm from females singly mated to *SP*-null males, 1d  
 574 ASM. **(B)** Sperm from females mated to *SP*-null males, remated to spermless males at 1d  
 575 ASFM and **(C)** at 4d ASFM, both frozen 2h ASSM. White arrows indicate sperm heads.  
 576 Bar=20µm **(D)** Western blot lanes# **1:** Fv, reproductive tract (RT) of virgin female  
 577 (negative control; n=5), **2:** M, a pair of male accessory gland (positive control; n=1), **3:**  
 578 SP-, reproductive tracts of females mated to *SP*-null males, 2h ASM (n=5), **4:** SOT,  
 579 reproductive tracts of females mated to spermless males, 1d ASM (n=5), **5:** SOT, SP-,  
 580 reproductive tract of females mated to spermless males and then remated to *SP*-null  
 581 males, 1d ASFM (n=8 RT), **6:** SOT, SP+, reproductive tract of females mated to spermless  
 582 males and then remated to control (SP+) males at 1d ASFM, frozen 2h ASSM (positive  
 583 control; n=8 RT), **7:** (SP-, SOT), 1d and **8:** (SP-, SOT), 4d sperm isolated from the seminal  
 584 receptacle of females mated to *SP*-null males and then remated to spermless males at 1d  
 585 ASFM and 4d ASFM, frozen 2h ASSM (n=15 SS). Actin served as loading control.



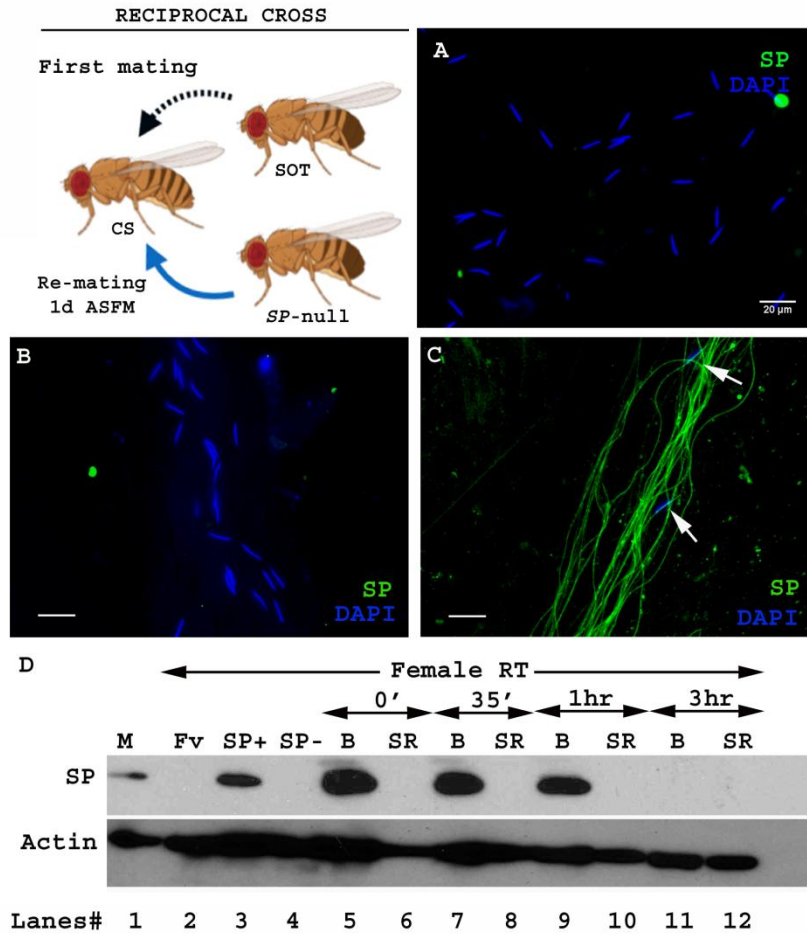

586

587 **Figure 2. Sperm from second male are not bound to SP from a prior spermless male.**  
 588 **(Cartoon):** Pictorial representation of cross (fly images from Biorender), that is  
 589 reciprocal of that in Fig 1. Females mated first with spermless (*sot*) male and then a day  
 590 later with *SP*-null male that provided sperm. Sperm heads were stained with DAPI  
 591 (blue) and SP visualized with Alexa fluor 488, staining the sperm tail (green) and sperm  
 592 head (cyan; overlapping blue/green). **(A)** Sperm from females singly mated to *SP*-null  
 593 males, 2hr ASM. **(B)** Sperm from females mated to spermless males and then remated to  
 594 *SP*-null males, 1d ASFM. **(C)** Sperm from females mated to spermless males and then  
 595 remated to *SP*+ males, 1d ASFM, serve as positive controls. Flies were frozen 2h ASFM.  
 596 White arrows indicate sperm heads. Bar=20μm **(D)** Western blot lanes# 1: M, a pair of  
 597 male accessory gland (positive control; n=1), 2: Fv, reproductive tract (RT) of virgin  
 598 female (negative control; n=5), 3: *SP*+, reproductive tract of females mated to control  
 599 males (TM3 siblings of *SP*-null males; n=5; positive control), 4: *SP*-, reproductive tract of  
 600 females mated to *SP*-null males (n=5; negative control). 5-12: Proteins from Bursa (B)  
 601 or seminal receptacle (SR) from females mated to spermless males frozen at 0'(min)  
 602 immediately after mating, 35'(min), 1hr, and 3hr ASM, respectively (n=15). Actin served  
 603 as loading control.

604



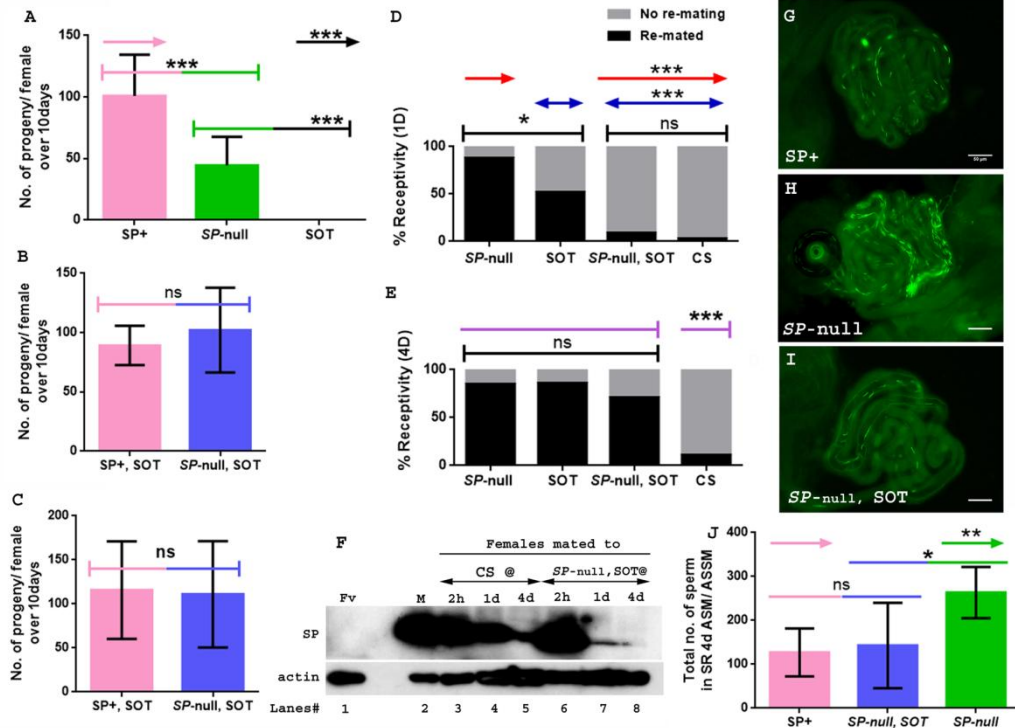

605  
606

607 **Figure 3. Remating with spermless males restores fertility, delays receptivity and**  
608 **optimizes efficient sperm release in females that previously mated to SP-null males**

609 **(A)** Graphical representation of numbers of progeny produced by each female over the  
610 span of ten days, following mating to control (TM3 siblings of *SP-null* males: *SP+*; pink),  
611 *SP-null* males (*SP-null*; green), or spermless males (SOT),  $p^{***} < 0.001$ ;  $n = 25-30$ . **(B)**  
612 Fertility of females mated to *SP-null* males and then remated to spermless males at 1d  
613 ASFM (*SP-null, SOT*; blue,  $n = 25-30$ ) and **(C)** Fertility of females mated to *SP-null* males  
614 and then remated to spermless males at 4d ASFM (*SP-null, SOT*; blue,  $n = 25-30$ )  
615 compared to females mated to control males and then remated to spermless males (*SP+*,  
616 SOT, pink, ns=non significant). **(D)** Percentage receptivity of females mated to *SP-null*  
617 males and then remated to spermless males (*SP-null, SOT*) at 1d ASFM, when compared  
618 to females singly mated to *SP-null* males (red arrows), spermless (SOT, blue arrows) or  
619 CS males, 1d ASM ( $p^* < 0.05$ ;  $p^{***} < 0.001$ ;  $n = 30-35$ ). **(E)** Percentage receptivity of  
620 females mated to *SP-null* males and then remated to spermless males (*SP-null, SOT*) at  
621 4d ASFM, when compared to females singly mated to *SP-null* males, spermless (SOT) or  
622 CS males (purple arrows), 4d ASM ( $p^{***} < 0.001$ ;  $n = 35-30$ ). **(F)** Western blot lanes# **1**:  
623 Fv, reproductive tract (RT) of 5 virgin females (negative control) **2**:, M, a pair of male  
624 accessory gland (positive control), **3,4,5**: RT of females mated to CS males, flash frozen  
625 at 2hrs ( $n = 5$ ), 1d ( $n = 15$ ) and 4d ( $n = 15$ ) ASM respectively, **6,7,8**: RT of females mated to  
626 *SP-null* males and then subsequently mated to spermless males at 1d ASFM, flash frozen  
627 2hrs ( $n = 5$ ), 1d ( $n = 15$ ) and 4d ( $n = 15$ ) ASSM, respectively. Actin served as loading  
628 control. **(G)** Sperm in the seminal receptacle (SR) of a typical females mated to a control  
629 male (*SP+*; *ProtB-eGFP*) at 4d ASM. **(H)** Sperm in the SR of a typical female mated to *SP-*  
630 *null*; *ProtB-eGFP* male at 4d ASM. **(I)** Sperm in the SR of a typical female, mated to *SP-*  
631 *null*; *ProtB-eGFP* and subsequently remated to a spermless male at 1d ASFM, and frozen  
632 at 4d ASSM. In G-I sperm heads are green due to eGFP. Bar=50 $\mu$ m. **(J)** Graphical  
633 representation of sperm counts in SRs of females singly-mated to control (*SP+*, pink,  
634 TM3 siblings of *SP-null*; *ProtB-eGFP*), *SP-null* (green) or doubly-mated to *SP-null* and  
635 spermless male (*SP-null, SOT*, blue) represented in G, H, I panels ( $p^{**} < 0.01$ ;  $p^* < 0.05$ ;  
636 ns=non significant;  $n = 15-20$ ).

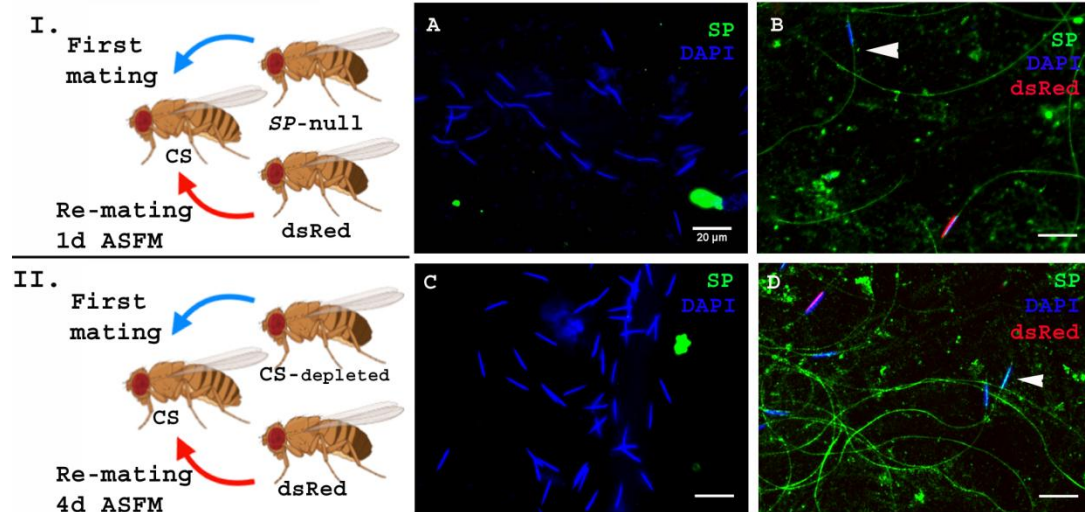

637  
638  
639

640 **Figure 4. SP from a male who also provides sperm can bind to SP-deficient sperm as**  
641 **well as to the donor's sperm. Cartoon (I):** Pictorial representation of the experimental  
642 cross (fly images from Biorender). Females mated to *SP*-null males were re-mated to  
643 control (*ProtB-dsRed*) males at 1d ASFM. **(A)** Sperm from females singly mated to *SP*-  
644 null males, 2hr ASM (blue sperm-head). **(B)** Sperm from females mated to *SP*-null males  
645 (blue sperm-head) re-mated to *ProtB-dsRed* (red+ blue sperm-head) males at 1d ASFM.  
646 SP visualized with Alexa fluor 488, staining the sperm (head+ tail; green). Flies were  
647 frozen 2h ASSM. White arrows indicate sperm heads (n=10; Bar = 20μm). **Cartoon (II):**  
648 Pictorial representation of the substitute cross (fly images from Biorender). Females  
649 mated to SFP depleted control (CS) males were re-mated to control (*Prot B-dsRed*) males  
650 at 4d ASFM. **(C)** Sperm from females singly-mated to SFP depleted CS males at 4d ASM  
651 (blue sperm-head). **(D)** Sperm from females mated to SFP depleted CS males (blue  
652 sperm-head), re-mated to *ProtB-dsRed* (red+ blue sperm-head) males at 4d ASFM. SP  
653 visualized with Alexa fluor 488, staining the sperm (head+ tail; green). Flies were frozen  
654 2h ASSM. White arrows indicate sperm heads (n=10; Bar = 20μm).

655

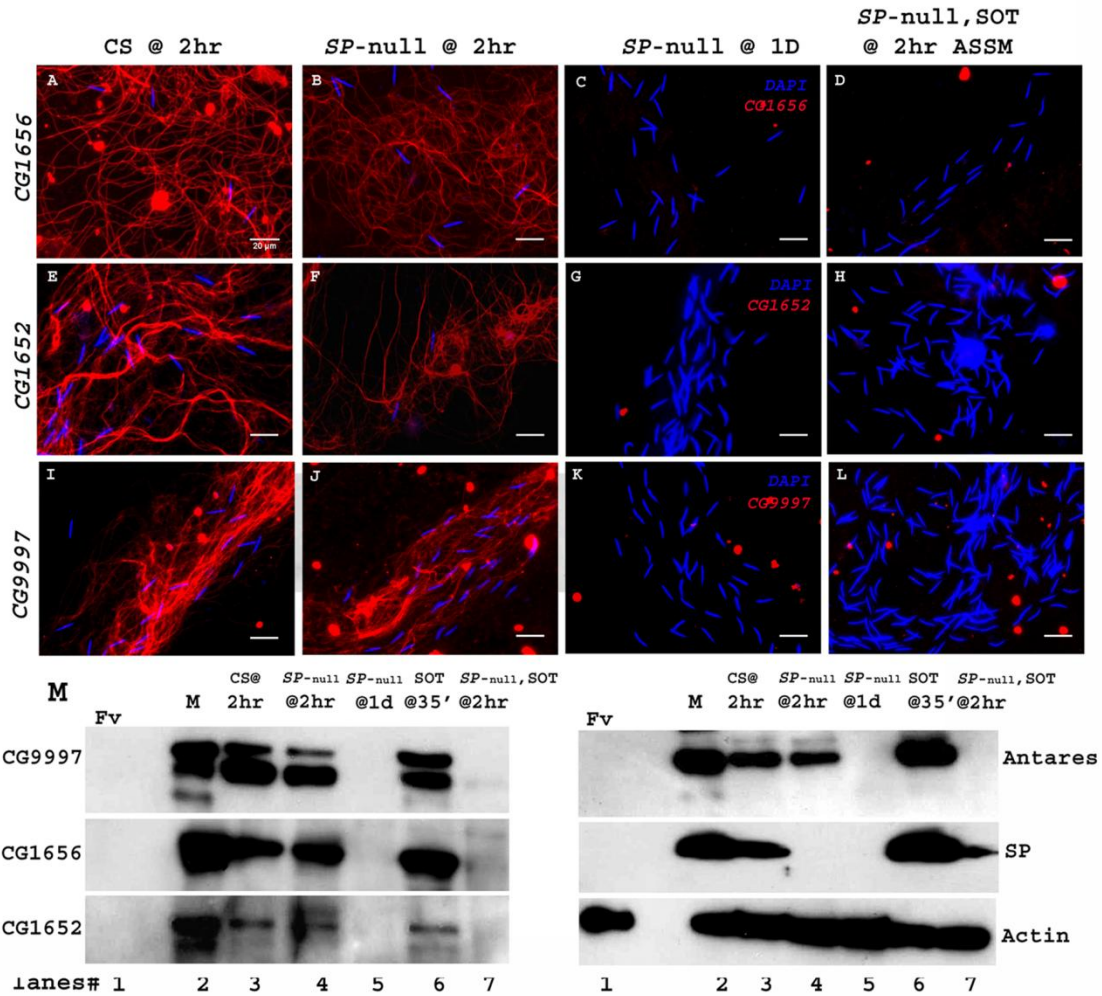

656

657 **Figure 5. Sperm do not bind detectable LTR-SFPs from a second male.** Females mated to  
658 to wild type (CS) males at 2hr ASM show LTR-SFPs bound to sperm, CG1656 (A),  
659 CG1652 (E), CG9997 (I). Females mated to *SP*-null males show the same (B,F,J) but by  
660 1d postmating LTR-SFPs' signal were no longer detected on sperm (C,G,K) confirming  
661 previous reports (please see [20]). Females mated to *SP*-null males and then remated to  
662 spermless males also do not show detectable signal for sperm-LTR-SFP binding for  
663 CG1656 (D), CG1652 (H) and CG9997 (L), 2hrs ASSM, although they have SP bound (Fig  
664 1). Sperm stained for the indicated LTR-SFP detected with Alexa fluor 594 (red) and  
665 sperm-head stained with DAPI (blue). Bar=20μm (M) Western blot probed for indicated  
666 LTR-SFPs. Lanes/samples are, 1: Fv, reproductive tract (RT) of 3 virgin females  
667 (negative control), 2: M, 1 pair of male accessory glands (positive control), 3: CS@2hr,  
668 sperm dissected from SR of 20 females mated to wild type (CS) males at 2hr ASM, 4:  
669 *SP*-null @ 2hr, sperm dissected from SR of 20 females mated to *SP*-null males at 2hr ASM, 5:  
670 *SP*-null @ 1d, sperm dissected from SR of 20 females mated to *SP*-null males at 1d ASM,  
671 6: SOT@35', reproductive tract of 3 females mated to spermless males at 35'ASM  
672 (positive control), 7: *SP*-null, SOT @ 2hr, sperm dissected from SR of 20 females mated  
673 to *SP*-null males and then remated to spermless males at 1d ASFM, and frozen at 2hr  
674 ASSM. Lanes were probed for LTR-SFPs CG9997, CG1656, antares and CG1652 and SP as  
675 described in the text. Actin served as loading control.



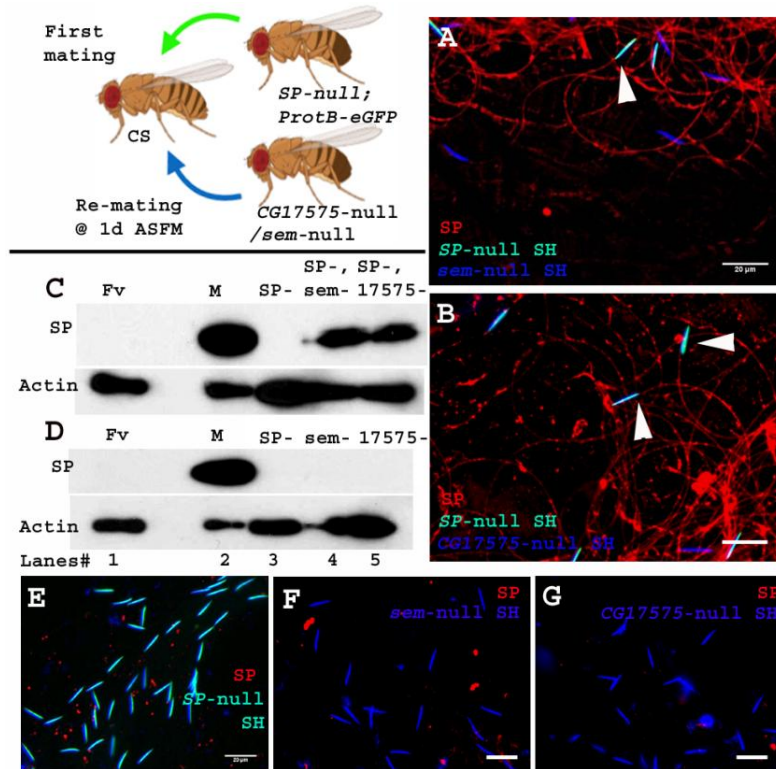

676

677 **Figure 6. Sperm received from *SP*-null males do not require *CG17575* or *seminase***  
 678 **from a second male to bind *SP* from that male. Cartoon:** Pictorial representation of  
 679 the experimental cross (fly images from Biorender). Females mated first with *SP*-null;  
 680 *ProtB-eGFP* male [cyan sperm-head; DAPI(blue)+eGFP(green)] and then a day later with  
 681 *CG17575*-null or *seminase*-null male (blue sperm-head; DAPI stained) and frozen, 2hrs  
 682 ASSM. *SP* was visualized with Alexa fluor 594, staining the sperm (head+ tail) red. **(A)**  
 683 Sperm from females mated to *SP*-null; *ProtB-eGFP* males and then remated to *seminase*-  
 684 null males, 1d ASFM. **(B)** Sperm from females mated to *SP*-null; *ProtB-eGFP* males and  
 685 then remated to *CG17575*-null males, 1d ASFM. **(C)** Western blot probed for *SP*.  
 686 Lanes/samples are, **1:** Fv, reproductive tract (RT) of 3 virgin females (negative control),  
 687 **2:** M, 1 pair of male accessory glands (positive control), **3:** *SP*-, sperm dissected from 20  
 688 females mated to *SP*-null; *ProtB-eGFP* males at 2hr ASM, **4:** *SP*-, *sem*-, sperm dissected  
 689 from 20 females mated to *SP*-null; *ProtB-eGFP* males and subsequently to *seminase*-null  
 690 males at 1d ASFM, frozen at 2hrs ASSM, **5:** *SP*-, *17575*-, sperm dissected from 20 females  
 691 mated to *SP*-null; *ProtB-eGFP* males and subsequently to *CG17575*-null males at 1d  
 692 ASFM, frozen at 2hrs ASSM. **(D)** Western blot probed for *SP*. Lanes/samples are, **1:** Fv,  
 693 reproductive tract (RT) of 3 virgin females (negative control), **2:** M, 1 pair of male  
 694 accessory glands (positive control), **3:** *SP*-, sperm dissected from 20 females mated to  
 695 *SP*-null; *ProtB-eGFP* males at 2hr ASM, **4:** *sem*-, sperm dissected from 20 females mated  
 696 to *seminase*-null males at 2hr ASM **5:** *17575*-, sperm dissected from 20 females mated to  
 697 *CG17575*-null males at 2hr ASM. Actin served as loading control. **(E)** Sperm isolated from  
 698 females singly mated to *SP*-null; *ProtB-eGFP* males, 2hr ASM. **(F)** Sperm isolated from  
 699 females singly mated to *seminase*-null male, 2hr ASM. **(G)** Sperm isolated from females  
 700 singly mated to *CG17575*-null male, 2hr ASM. Flies were frozen 2h ASSM. White arrows  
 701 indicate sperm heads (represented as SH, n=10; Bar=20µm).

702 **Supplementary figures**

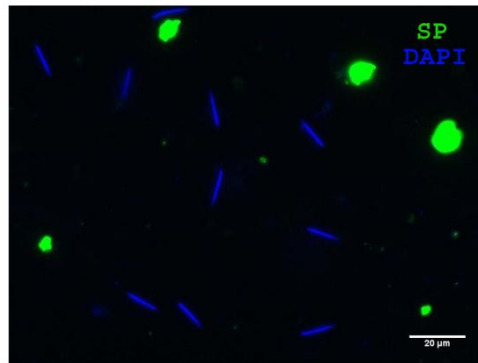

703

704 **Fig S1:** Sperm from females mated to spermless males and then remated to *SP*-null  
705 males, 3-6hrs ASFM, frozen at 2hrs ASSM. Sperm heads were stained with DAPI (blue)  
706 and presence of SP (green) detected with Alexa fluor 488 (n=5; Bar=20μm).

707

708

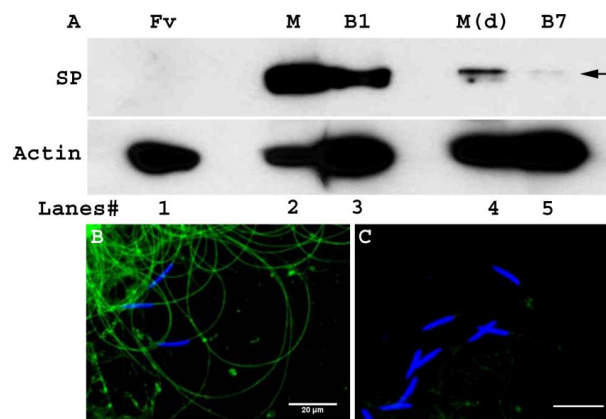

709

710 **Fig S2: (A)** Western blot probed for SP. Lanes/samples are, **1:** Fv, reproductive tract  
711 (RT) of 2 virgin females (negative control), **2:** M, 1 pair of male accessory glands from a  
712 3 day old unmated virgin male, **3:** B1, RT of 4 females mated to control unmated virgin  
713 males, frozen at 2hr ASM, **4:** M(d), 1 pair of male accessory glands from a multiply mated  
714 male (with six virgin females), **5:** B7, RT of 4 females mated to multiply-mated males,  
715 frozen at 2hr ASM. Actin served as loading control. **(B)** Sperm dissected from females  
716 mated to unmated males, frozen at 2hrs ASM. **(C)** Sperm dissected from females mated  
717 to multiply mated males, frozen at 2hrs ASM. Sperm heads were stained with DAPI  
718 (blue) and presence of SP (green) detected with Alexa fluor 488 (n=5; Bar=20μm).

719

720

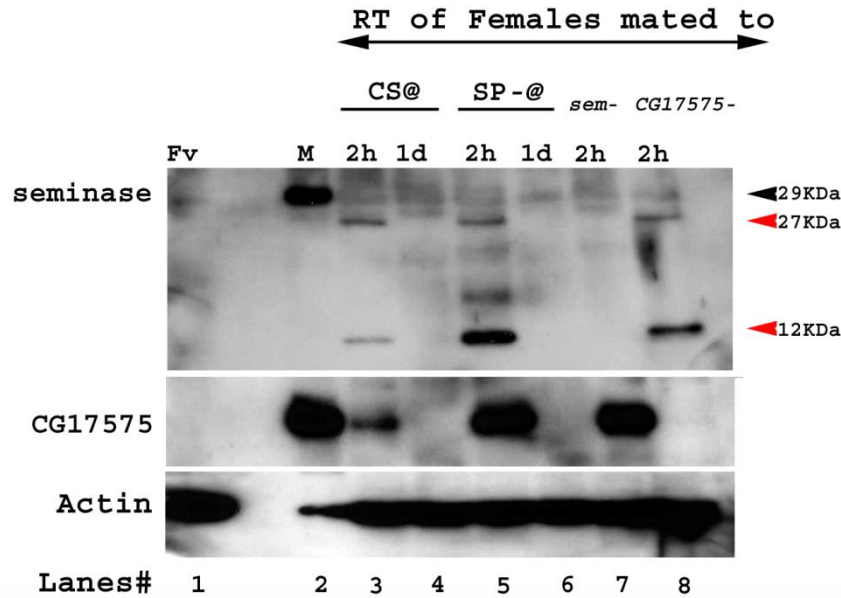

721

722 **Fig S3:** Western blot probed for seminase and CG17575. Lanes/samples are, **1:** Fv,  
 723 reproductive tract (RT) of 3 virgin females (negative control), **2:** M, 1 pair of male  
 724 accessory glands (positive control), **3-4:** RT of 5 females mated to wild type (CS) males  
 725 at 2hr and 1d ASM, respectively, **5-6:** RT of 5 females mated to *SP-null; ProtB-eGFP*  
 726 males at 2hr and 1d ASM, respectively **7:** RT of 5 females mated to *seminase*-null males  
 727 at 2hr ASM **8:** RT of 5 females mated to *CG17575*-null males at 2hr ASM. Black arrows  
 728 indicate full length seminase, red arrows indicate the cleavage products of seminase,  
 729 post-mating in the female RT. Actin served as loading control.

730

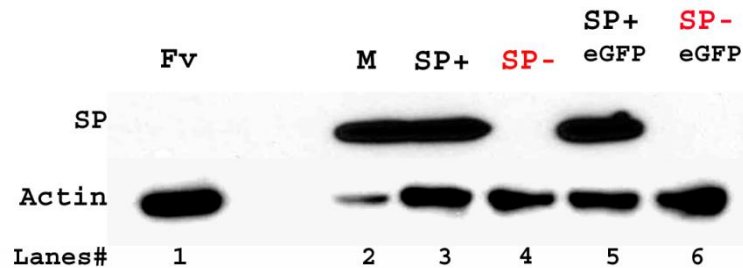

731

732 **Fig S4:** Western blot probed for SP. Lanes/samples are, **1:** Fv, reproductive tract (RT) of  
 733 3 virgin females (negative control), **2:** M, 1 pair of male accessory glands (positive  
 734 control), **3:** SP+, RT of 3 females mated to control (TM3 siblings of *SP-null*; positive  
 735 control) males at 2hr ASM, **4:** SP-, RT of 3 females mated to *SP-null* males at 2hr ASM, **5:**  
 736 SP+ eGFP, RT of 3 females mated to control (TM3 siblings of *SP-null; ProtB-eGFP*;  
 737 positive control) males at 2hr ASM **6:** SP- eGFP, RT of 3 females mated to *SP-null; ProtB-*  
 738 *eGFP* males at 2hr ASM. Actin served as loading control.

739

740

741

742

743 **Bibliography**

- 744 1. Parker GA. Sperm competition and its evolutionary consequences in the insects.  
745 Biol Rev. 1970;45: 525–567. doi:10.1111/j.1469-185x.1970.tb01176.x
- 746 2. Parker GA. Sexual selection and sexual conflict. Sexual Selection and  
747 Reproductive Competition in Insects. 1979. pp. 123–166. doi:10.1016/b978-0-  
748 12-108750-0.50010-0
- 749 3. Almeida FC, Desalle R. Evidence of adaptive evolution of accessory gland proteins  
750 in closely related species of the *Drosophila repleta* group. Mol Biol Evol. 2008;25:  
751 2043–2053. doi:10.1093/molbev/msn155
- 752 4. Birkhead TR. Cryptic Female Choice: Criteria for Establishing Female Sperm  
753 Choice. Evolution. 1998;52: 1212. doi:10.2307/2411251
- 754 5. Pitnick S, Miller GT. Correlated response in reproductive and life history traits to  
755 selection on testis length in *Drosophila hydei*. Heredity. 2000;84: 416–426.  
756 doi:10.1046/j.1365-2540.2000.00679.x
- 757 6. Avila FW, Ram KR, Bloch Qazi MC, Wolfner MF. Sex peptide is required for the  
758 efficient release of stored sperm in mated drosophila females. Genetics.  
759 2010;186: 595–600. doi:10.1534/genetics.110.119735
- 760 7. Poiani A. Complexity of seminal fluid: A review. Behavioral Ecology and  
761 Sociobiology. 2006. pp. 289–310. doi:10.1007/s00265-006-0178-0
- 762 8. Ram KR, Wolfner MF. Seminal influences: *Drosophila* Acps and the molecular  
763 interplay between males and females during reproduction. Integr Comp Biol.  
764 2007;47: 427–445. doi:10.1093/icb/icm046
- 765 9. Ravi Ram K, Ji S, Wolfner MF. Fates and targets of male accessory gland proteins  
766 in mated female *Drosophila melanogaster*. Insect Biochem Mol Biol. 2005;35:  
767 1059–1071. doi:10.1016/j.ibmb.2005.05.001
- 768 10. Ravi Ram K, Wolfner MF. A network of interactions among seminal proteins  
769 underlies the long-term postmating response in *Drosophila*. Proc Natl Acad Sci U  
770 S A. 2009;106: 15384–15389. doi:10.1073/pnas.0902923106
- 771 11. Wigby S, Sirot LK, Linklater JR, Buehner N, Calboli FCF, Bretman A, et al. Seminal  
772 Fluid Protein Allocation and Male Reproductive Success. Curr Biol. 2009;19: 751–  
773 757. doi:10.1016/j.cub.2009.03.036
- 774 12. Avila FW, Sirot LK, LaFlamme BA, Rubinstein CD, Wolfner MF. Insect Seminal  
775 Fluid Proteins: Identification and Function. Annu Rev Entomol. 2011;56: 21–40.  
776 doi:10.1146/annurev-ento-120709-144823
- 777 13. Bath E, Bowden S, Peters C, Reddy A, Tobias JA, Easton-Calabria E, et al. Sperm  
778 and sex peptide stimulate aggression in female *Drosophila*. Nat Ecol Evol. 2017;1:  
779 1–16. doi:10.1038/s41559-017-0154
- 780 14. Scheunemann L, Lampin-Saint-Amaux A, Schor J, Preat T. A sperm peptide  
781 enhances long-term memory in female drosophila. Sci Adv. 2019;5.  
782 doi:10.1126/sciadv.aax3432
- 783 15. Elwyn Isaac R, Li C, Leedale AE, Shirras AD. *Drosophila* male sex peptide inhibits

- 784 siesta sleep and promotes locomotor activity in the post-mated female. Proc R  
785 Soc B Biol Sci. 2010;277: 65–70. doi:10.1098/rspb.2009.1236
- 786 16. Domanitskaya E V., Liu H, Chen S, Kubli E. The hydroxyproline motif of male sex  
787 peptide elicits the innate immune response in *Drosophila* females. FEBS J.  
788 2007;274: 5659–5668. doi:10.1111/j.1742-4658.2007.06088.x
- 789 17. Chapman T, Bangham J, Vinti G, Seifried B, Lung O, Wolfner MF, et al. The sex  
790 peptide of *Drosophila melanogaster*: Female post-mating responses analyzed by  
791 using RNA interference. Proc Natl Acad Sci U S A. 2003;100: 9923–9928.  
792 doi:10.1073/pnas.1631635100
- 793 18. Schwenke RA, Lazzaro BP, Wolfner MF. Reproduction–Immunity Trade-Offs in  
794 Insects. Annu Rev Entomol. 2016;61: 239–256. doi:10.1146/annurev-ento-  
795 010715-023924
- 796 19. Peng J, Chen S, Büsler S, Liu H, Honegger T, Kubli E. Gradual release of sperm  
797 bound sex-peptide controls female postmating behavior in *Drosophila*. Curr Biol.  
798 2005;15: 207–213. doi:10.1016/j.cub.2005.01.034
- 799 20. Singh A, Buehner NA, Lin H, Baranowski KJ, Findlay GD, Wolfner MF. Long-term  
800 interaction between *Drosophila* sperm and sex peptide is mediated by other  
801 seminal proteins that bind only transiently to sperm. Insect Biochem Mol Biol.  
802 2018;102: 43–51. doi:10.1016/j.ibmb.2018.09.004
- 803 21. Findlay GD, Sitnik JL, Wang W, Aquadro CF, Clark NL, Wolfner MF. Evolutionary  
804 Rate Covariation Identifies New Members of a Protein Network Required for  
805 *Drosophila melanogaster* Female Post-Mating Responses. PLoS Genet. 2014;10.  
806 doi:10.1371/journal.pgen.1004108
- 807 22. Apper-McGlaughon J, Wolfner MF. Post-mating change in excretion by mated  
808 *Drosophila melanogaster* females is a long-term response that depends on sex  
809 peptide and sperm. J Insect Physiol. 2013;59: 1024–1030.  
810 doi:10.1016/j.jinsphys.2013.07.001
- 811 23. Carvalho GB, Kapahi P, Anderson DJ, Benzer S. Allocrine Modulation of Feeding  
812 Behavior by the Sex Peptide of *Drosophila*. Curr Biol. 2006;16: 692–696.  
813 doi:10.1016/j.cub.2006.02.064
- 814 24. Gioti A, Wigby S, Wertheim B, Schuster E, Martinez P, Pennington CJ, et al. Sex  
815 peptide of *Drosophila melanogaster* males is a global regulator of reproductive  
816 processes in females. Proc R Soc B Biol Sci. 2012;279: 4423–4432.  
817 doi:10.1098/rspb.2012.1634
- 818 25. Garbaczewska M, Billeter JC, Levine JD. *Drosophila melanogaster* males increase  
819 the number of sperm in their ejaculate when perceiving rival males. J Insect  
820 Physiol. 2013;59: 306–310. doi:10.1016/j.jinsphys.2012.08.016
- 821 26. Sirot LK, Wolfner MF, Wigby S. Protein-specific manipulation of ejaculate  
822 composition in response to female mating status in *Drosophila melanogaster*.  
823 Proc Natl Acad Sci U S A. 2011;108: 9922–9926. doi:10.1073/pnas.1100905108
- 824 27. Neubaum DM, Wolfner MF. Mated *Drosophila melanogaster* females require a  
825 seminal fluid protein, Acp36DE, to store sperm efficiently. Genetics. 1999;153:  
826 845–857.



- 827 28. Rubinstein CD, Wolfner MF. *Drosophila* seminal protein ovulin mediates  
828 ovulation through female octopamine neuronal signaling. *Proc Natl Acad Sci U S*  
829 *A*. 2013;110: 17420–17425. doi:10.1073/pnas.1220018110
- 830 29. Avila FW, Wolfner MF. Acp36DE is required for uterine conformational changes  
831 in mated *Drosophila* females. *Proc Natl Acad Sci U S A*. 2009;106: 15796–15800.  
832 doi:10.1073/pnas.0904029106
- 833 30. Xue L, Noll M. *Drosophila* female sexual behavior induced by sterile males  
834 showing copulation complementation. *Proc Natl Acad Sci U S A*. 2000;97: 3272–  
835 3275. doi:10.1073/pnas.97.7.3272
- 836 31. Kalb JM, Dibeneditto AJ, Wolfner MF. Probing the function of *Drosophila*  
837 melanogaster accessory glands by directed cell ablation. *Proc Natl Acad Sci U S A*.  
838 1993;90: 8093–8097. doi:10.1073/pnas.90.17.8093
- 839 32. Shao L, Chung P, Wong A, Siwanowicz I, Kent CF, Long X, et al. A Neural Circuit  
840 Encoding the Experience of Copulation in Female *Drosophila*. *Neuron*. 2019;102:  
841 1025-1036.e6. doi:10.1016/j.neuron.2019.04.009
- 842 33. Laturney M, Billeter JC. *Drosophila melanogaster* females restore their  
843 attractiveness after mating by removing male anti-aphrodisiac pheromones. *Nat*  
844 *Commun*. 2016;7. doi:10.1038/ncomms12322
- 845 34. Liu H, Kubli E. Sex-peptide is the molecular basis of the sperm effect in *Drosophila*  
846 melanogaster. *Proc Natl Acad Sci U S A*. 2003;100: 9929–9933.  
847 doi:10.1073/pnas.1631700100
- 848 35. Chen PS, Stumm-Zollinger E, Caldelari M. Protein metabolism of *Drosophila* male  
849 accessory glands-II. Species-specificity of secretion proteins. *Insect Biochem*.  
850 1985;15: 385–390. doi:10.1016/0020-1790(85)90030-7
- 851 36. Chen PS, Stumm-Zollinger E, Aigaki T, Balmer J, Bienz M, Böhlen P. A male  
852 accessory gland peptide that regulates reproductive behavior of female *D*.  
853 melanogaster. *Cell*. 1988;54: 291–298. doi:10.1016/0092-8674(88)90192-4
- 854 37. Manier MK, Belote JM, Berben KS, Novikov D, Stuart WT, Pitnick S. Resolving  
855 mechanisms of competitive fertilization success in *Drosophila melanogaster*.  
856 *Science*. 2010;328: 354–357. doi:10.1126/science.1187096
- 857 38. Hihara F. Effects of male accessory gland secretion on oviposition and remating in  
858 females of *Drosophila melanogaster*. *Zool Mag*. 1981;90: 307–316.
- 859 39. LaFlamme BA, Ravi Ram K, Wolfner MF. The *Drosophila melanogaster* seminal  
860 fluid protease “Seminase” regulates proteolytic and post-mating reproductive  
861 processes. *PLoS Genet*. 2012;8: 30–32. doi:10.1371/journal.pgen.1002435
- 862 40. Sitnik J, Gligorov D, Maeda R, Karch F, Wolfner MF. The female post-mating  
863 response requires genes expressed in the secondary cells of the male accessory  
864 gland in *Drosophila melanogaster*. *Genetics*. 2016;202: 1029–1041.  
865 doi:10.1534/genetics.115.181644
- 866 41. Ram KR, Wolfner MF. Sustained post-mating response in *Drosophila*  
867 melanogaster requires multiple seminal fluid proteins. *PLoS Genet*. 2007;3:  
868 2428–2438. doi:10.1371/journal.pgen.0030238

- 869 42. Den Boer SPA, Baer B, Boomsma JJ. Seminal fluid mediates ejaculate competition  
870 in social insects. *Science*. 2010;327: 1506–1509. doi:10.1126/science.1184709
- 871 43. Nguyen TTX, Moehring AJ. A male's seminal fluid increases later competitors'  
872 productivity. *J Evol Biol*. 2018;31: 1572–1581. doi:10.1111/jeb.13352
- 873 44. Chapman T, Neubaum DM, Wolfner MF, Partridge L. The role of male accessory  
874 gland protein Acp36DE in sperm competition in *Drosophila melanogaster*. *Proc R  
875 Soc B Biol Sci*. 2000;267: 1097–1105. doi:10.1098/rspb.2000.1114
- 876 45. Ram KR, Sirot LK, Wolfner MF. Predicted seminal astacin-like protease is  
877 required for processing of reproductive proteins in *Drosophila melanogaster*.  
878 *Proc Natl Acad Sci U S A*. 2006;103: 18674–18679.  
879 doi:10.1073/pnas.0606228103
- 880 46. Boswell RE, Mahowald AP. tudor, a gene required for assembly of the germ plasm  
881 in *Drosophila melanogaster*. *Cell*. 1985;43: 97–104. doi:10.1016/0092-  
882 8674(85)90015-7
- 883 47. Misra S, Singh A, Ratnasekhar CH, Sharma V, Reddy Mudiam MK, Ram KR.  
884 Identification of *Drosophila*-based endpoints for the assessment and  
885 understanding of xenobiotic-mediated male reproductive adversities. *Toxicol Sci*.  
886 2014;141: 278–291. doi:10.1093/toxsci/kfu125
- 887 48. Gilchrist AS, Partridge L. Male identity and sperm displacement in *Drosophila*  
888 *melanogaster*. *J Insect Physiol*. 1995;41: 1087–1092. doi:10.1016/0022-  
889 1910(95)00068-6
- 890
- 891
- 892
- 893
- 894
- 895
- 896
